# Supplementary material for: A highly selective fluorescent sensor for fluoride through ESPT signaling transduction
Source: Royal Society of Chemistry journal article supplement (doi:10.1039/b605087e), 2006-01-01
Supplement: b605087e.pdf [file b605087e.pdf]

---

## A Highly Selective Fluorescent Sensor for Fluoride through ESPT Signaling Transduction

Yong-gang Zhao, Bing-guang Zhang, Chun-ying Duan,\* Zhi-hua Lin and Qing-jin Meng \*

### Supporting information

#### Contents

1. Color changes seen for compound H-NP2 upon the addition of anions.
2.  $^1\text{H}$  NMR titrations of H-NP4 in DMSO- $d_6$  ( $5 \times 10^{-3}$  M) with  $\text{F}^-$ .
3. UV-vis spectra of H-NP3 in DMSO ( $5 \times 10^{-5}$  M) upon addition of  $\text{F}^-$ .
4. Emission spectra changes of H-NP4 ( $5 \times 10^{-5}$  M) upon addition of  $\text{F}^-$ .

1. Color changes seen for compound H-NP2 upon the addition of anions.

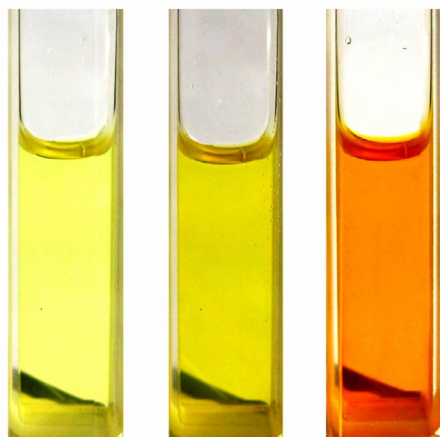

**Figure S1.** Color changes seen for DMSO solutions of compound H-NP2 upon the addition of anions as TBA salts: left, free; middle, with 1 eq  $\text{F}^-$ ; right, with 1 eq  $\text{H}_2\text{PO}_4^-$ .

2.  $^1\text{H}$  NMR titrations of H-NP4 in  $\text{DMSO-}d_6$  ( $5 \times 10^{-3}$  M) with  $\text{F}^-$ .

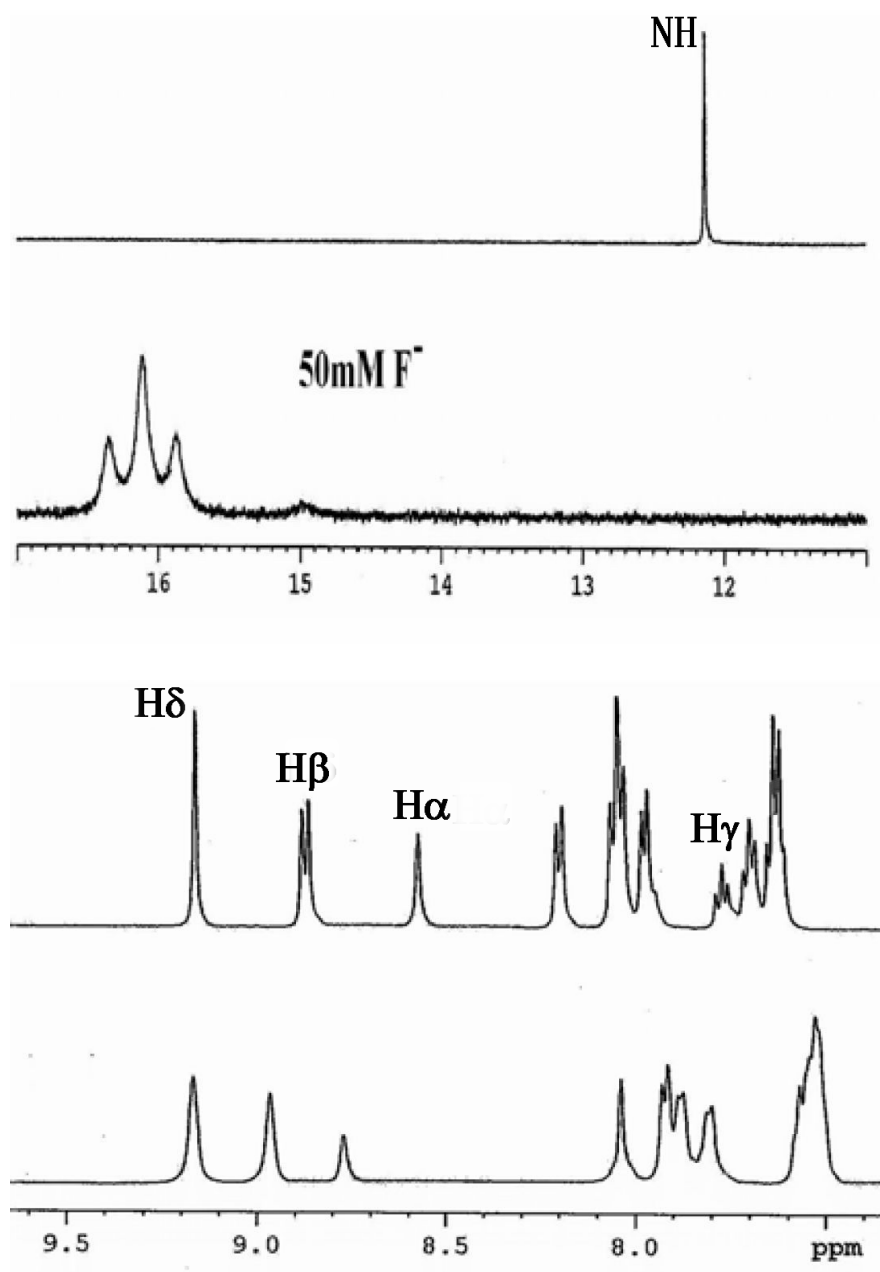

**Figure S2.**  $^1\text{H}$  NMR titration H-NP4 in  $\text{DMSO-}d_6$  ( $5 \times 10^{-3}$  M) with  $\text{F}^-$ .

3. UV-vis spectra of H-NP3 in DMSO ( $5 \times 10^{-5}$  M) upon addition of  $F^-$ .

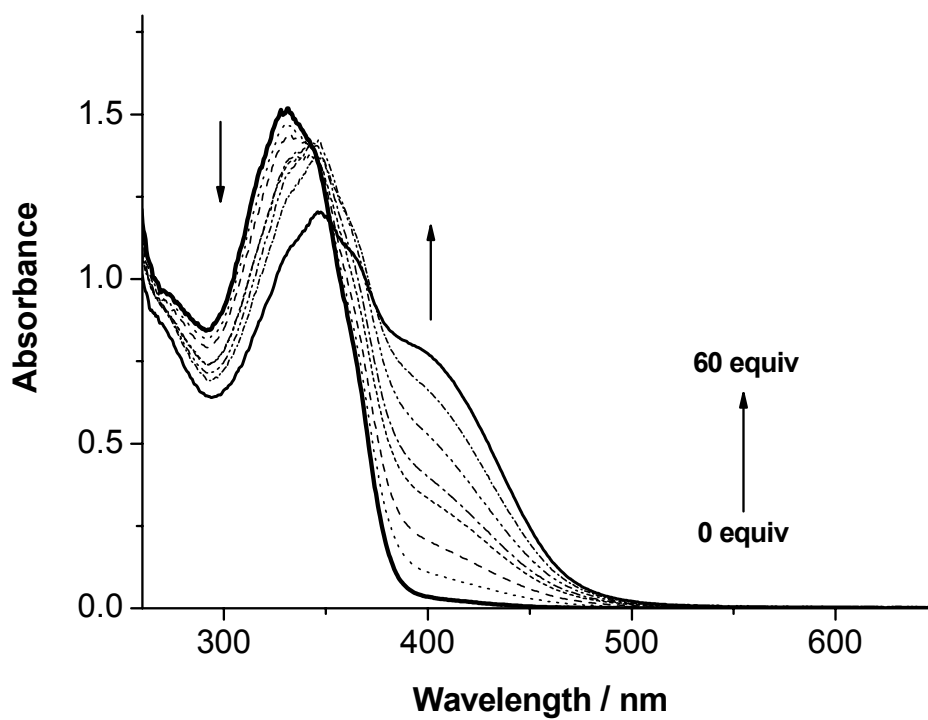

**Figure S3.** UV-vis spectra of H-NP3 in DMSO ( $5 \times 10^{-5}$  M) upon addition of  $F^-$ .

4. Emission spectra changes of H-NP4 ( $5 \times 10^{-5}$  M) upon addition of  $F^-$ .

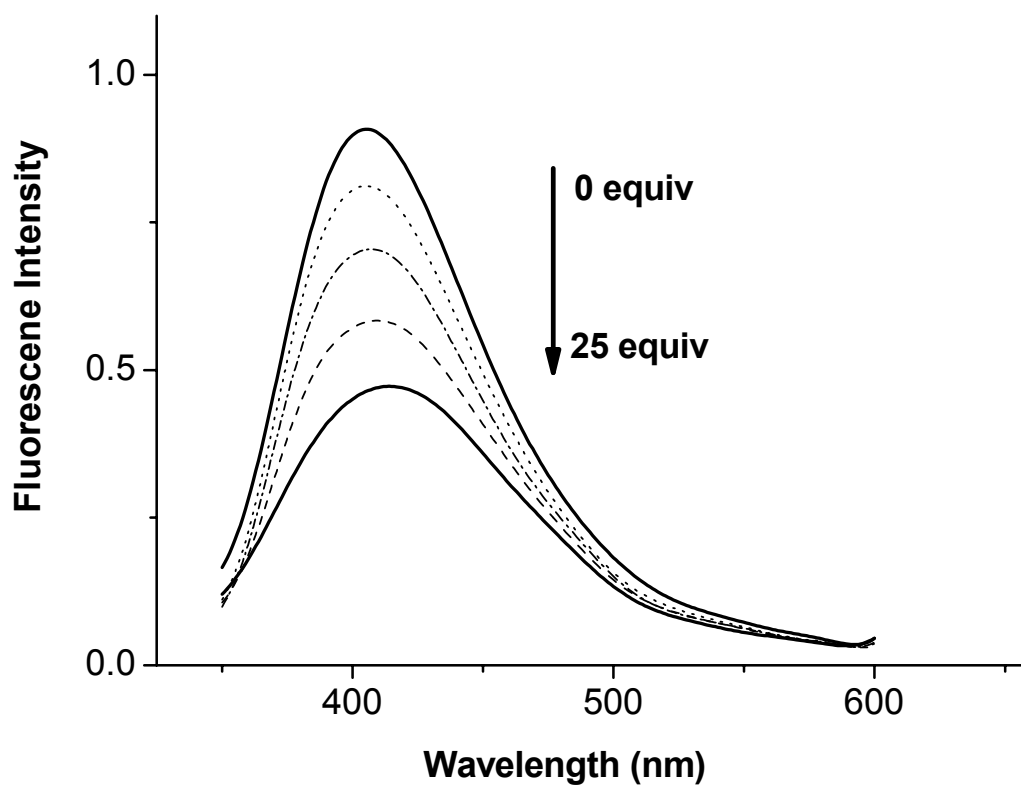

**Figure S4.** Emission spectra changes of H-NP4 ( $5 \times 10^{-5}$  M) upon addition of  $F^-$  in DMSO, excited at 362nm.
